# Supplementary material for: The effect of ethnicity on outcomes in a practice-based trial to improve cardiovascular disease prevention
Source: PubMed Central journal article supplement (PMC544361; doi:10.1186/1475-9276-3-12), 2004-12-07
Supplement: 1475-9276-3-12-S1.pdf [file 1475-9276-3-12-S1.pdf]

Table 3. Study indicators as measured at baseline (B) and the end (E) of the study for all patients and minority patients within each of the 3 practices.

| Study Indicator               | Practice A     |        |                |       | Practice B        |        |                |       | Practice C     |        |                |       |
|-------------------------------|----------------|--------|----------------|-------|-------------------|--------|----------------|-------|----------------|--------|----------------|-------|
|                               | Black Patients |        | White Patients |       | Hispanic Patients |        | White Patients |       | Black Patients |        | White Patients |       |
|                               | B              | E      | B              | E     | B                 | E      | B              | E     | B              | E      | B              | E     |
| <b>Hypertension</b>           |                |        |                |       |                   |        |                |       |                |        |                |       |
| BP in 12 months               | 90.5%          | 92.5%* | 89.6%          | 89.8% | 85.0%             | 87.8%* | 88.0%          | 87.6% | 97.3%          | 99.1%* | 98.1%          | 99.2% |
| Dx HTN 3 BP >=140/90          | 88.9%          | 97.1%* | 88.8%          | 94.8% | -                 | -      | 56.1%          | 68.3% | -              | 91.7%  | 88.9%          | 81.5% |
| BP in 3 months HTN patients   | 63.7%          | 67.9%* | 61.5%          | 65.6% | 38.9%             | 33.3%* | 67.5%          | 48.0% | 56.0%          | 60.0%* | 56.3%          | 53.9% |
| Last BP <140/90 all patients  | 54.9%          | 70.4%  | 56.9%          | 76.0% | 78.3%             | 87.2%  | 73.0%          | 83.2% | 86.4%          | 96.7%* | 87.9%          | 90.7% |
| Last BP <140/90 HTN patients  | 38.6%          | 64.0%  | 44.5%          | 72.0% | 33.3%             | 50.0%  | 32.3%          | 59.5% | 60.0%          | 63.2%  | 65.7%          | 72.4% |
| <b>Hyperlipidemia</b>         |                |        |                |       |                   |        |                |       |                |        |                |       |
| Cholesterol in 60 months      | 74.3%          | 86.0%* | 80.0%          | 87.7% | -                 | 75.1%  | -              | 66.8% | -              | 38.9%  | -              | 40.0% |
| HDL-C in 60 months            | 72.1%          | 85.0%* | 77.0%          | 85.6% | -                 | 74.7%  | -              | 67.2% | -              | 38.5%  | -              | 40.0% |
| <b>Coronary Heart Disease</b> |                |        |                |       |                   |        |                |       |                |        |                |       |
| LDL-C in 12 months            | 85.7%          | 92.9%* | 83.3%          | 84.2% | -                 | -      | 41.7%          | 61.9% | -              | -      | -              | 42.9% |
| Dx hyperlipidemia LDL-C > 130 | -              | -      | 96.7%          | 94.7% | -                 | -      | -              | -     | -              | -      | -              | -     |
| Rx for LDL-C >130             | -              | -      | 73.3%          | 52.6% | -                 | -      | -              | -     | -              | -      | -              | -     |
| Beta-blocker MI patients      | -              | -      | -              | -     | -                 | -      | -              | -     | -              | -      | -              | -     |
| Last LDL-C <100               | 50.0%          | 46.2%  | 34.3%          | 53.6% | -                 | -      | 40.0%          | 46.2% | -              | -      | -              | -     |
| Last BP <140/90               | 84.6%          | 71.4%  | 49.2%          | 80.9% | -                 | -      | 52.4%          | 66.7% | -              | -      | -              | -     |
| <b>Heart Failure</b>          |                |        |                |       |                   |        |                |       |                |        |                |       |
| Rx for ACE or ARB             | -              | -      | 66.0%          | 71.7% | -                 | -      | -              | -     | -              | -      | -              | 69.2% |
| <b>Atrial Fibrillation</b>    |                |        |                |       |                   |        |                |       |                |        |                |       |
| Rx of oral anti-coagulant     | -              | -      | 47.6%          | 58.3% | -                 | -      | -              | -     | -              | -      | -              | -     |
| <b>Diabetes Mellitus</b>      |                |        |                |       |                   |        |                |       |                |        |                |       |
| HgbA1c in 12 months           | 82.6%          | 81.3%  | 60.7%          | 90.4% | -                 | 92.9%  | -              | 67.0% | -              | 40.9%  | -              | 44.4% |
| LDL-C in 24 months            | 82.6%          | 90.6%* | 86.9%          | 94.9% | 45.5%             | 78.6%* | 56.9%          | 80.2% | -              | 59.1%  | -              | 68.1% |
| BP in 3 months                | 73.9%          | 75.0%  | 70.5%          | 72.1% | 45.5%             | 21.4%  | 68.6%          | 52.8% | 64.3%          | 59.1%* | 48.7%          | 43.1% |
| Last HgbA1c < 7               | 63.2%          | 46.2%  | 56.8%          | 48.7% | -                 | 38.5%  | -              | 55.7% | -              | -      | -              | -     |
| Last LDL-C < 100              | 35.3%          | 46.4%  | 40.0%          | 56.3% | -                 | -      | 25.0%          | 40.0% | -              | -      | -              | 40.0% |
| Last BP <130/85               | 43.5%          | 65.6%  | 44.8%          | 78.8% | 63.6%             | 66.7%  | 54.2%          | 64.4% | 78.6%          | 68.2%  | 77.8%          | 73.2% |

Abbreviations

BP: blood pressure; Dx: diagnosis; HTN: hypertension; HDL-C: high density lipoprotein cholesterol; LDL-C: low density lipoprotein cholesterol; MI: past history of myocardial infarction; Rx: prescription; ACE: angiotensin converting enzyme inhibitor; ARB: angiotensin receptor blocker; HgbA1c: hemoglobin A1c

Note: When the number of subjects for the denominator of a given measure was < 10, or if sufficient lab data were not recorded to calculate the measure of interest, the data are not considered reliable and thus indicated by a dash in the above table.

\* Improvement (end-of-study – baseline) in minority group was greater than that observed for all patients.
